# Supplementary material for: Highly efficient single-cell analysis of microbial cells by time-resolved inductively coupled plasma mass spectrometry
Source: Royal Society of Chemistry journal article supplement (doi:10.1039/c4ja00040d), 2014-01-01
Supplement: c4ja00040d1.pdf [file c4ja00040d1.pdf]

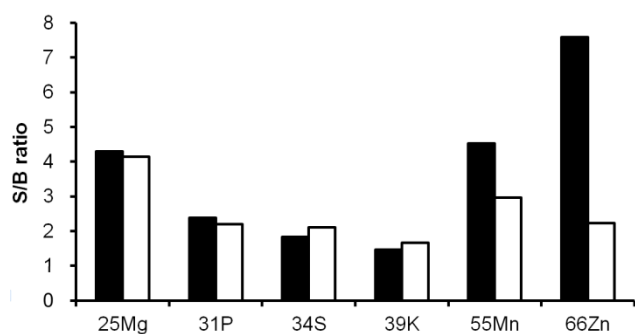

**Fig. S1** Comparison between performances of the longer spray chamber (black bar) used in this study and the original one (white bar) in terms of S/B ratios of several elements ( $^{25}\text{Mg}$ ,  $^{31}\text{P}$ ,  $^{34}\text{S}$ ,  $^{39}\text{K}$ ,  $^{55}\text{Mn}$ , and  $^{66}\text{Zn}$ ) under the same experimental conditions using a suspension of *S. cerevisiae* cells and a conventional ICP-MS system (without the external ion pulse counting unit) with 10 ms integration time.
