# Supplementary material for: Highly efficient single-cell analysis of microbial cells by time-resolved inductively coupled plasma mass spectrometry
Source: Royal Society of Chemistry journal article supplement (doi:10.1039/c4ja00040d), 2014-01-01
Supplement: c4ja00040d2.pdf [file c4ja00040d2.pdf]

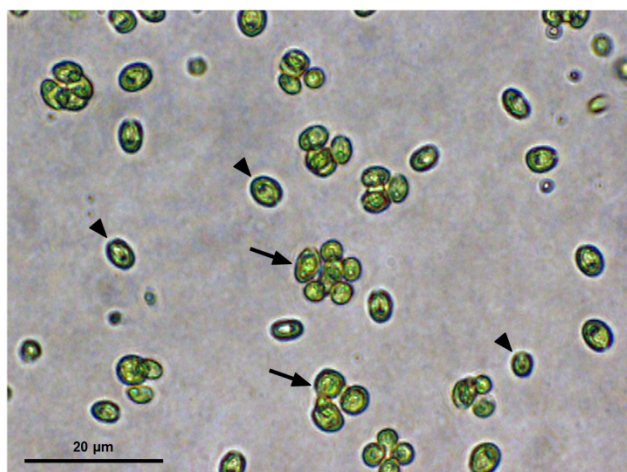

**Fig. S2** Microscopic photograph of *C. reinhardtii* CC-125 cells. Cells exist as independent cells with a diameter of 2 μm–9 μm (arrowhead) or form clusters with a diameter of more than approximately 9 μm (arrow).
