# Supplementary material for: Highly efficient single-cell analysis of microbial cells by time-resolved inductively coupled plasma mass spectrometry
Source: Royal Society of Chemistry journal article supplement (doi:10.1039/c4ja00040d), 2014-01-01
Supplement: c4ja00040d3.pdf [file c4ja00040d3.pdf]

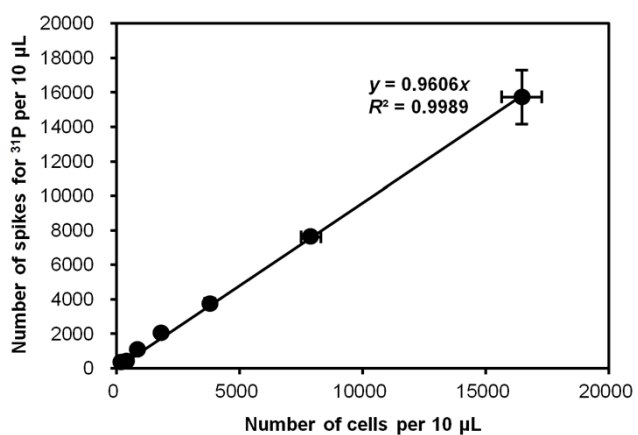

**Fig. S3** The effect of varying cell number densities on the spike frequency for <sup>31</sup>P in a 60 s measurement at 10 µL min<sup>-1</sup> (*i.e.*, 10 µL). Y error bars were calculated from the RSD of the number of spikes for <sup>31</sup>P; X error bars were calculated from the RSD of the number of cells per 10µL of each suspension.
